# Supplementary material
Source: PubMed Central journal article supplement (PMC3023977)

1 **SUPPLEMENTARY FIGURE LEGENDS**

2 **Figure S1. Amino acid sequence alignment for three alleles of rhesus tetherin**

3 The predicted amino acid sequences are shown for three alleles of rhesus macaque  
4 tetherin. Full-length tetherin cDNA sequences were amplified by RT-PCR from mRNA  
5 isolated from rhesus macaque lymphocytes using primers to sequences in the 5' and 3'  
6 untranslated regions of the gene, cloned into pGEM-T Easy (Promega) and sequenced.

7

8 **Figure S2. The expression of  $\psi$ Nef *in trans* does not rescue virus release in the**  
9 **presence of rhesus tetherin**

10 (A) The predicted amino acid sequences for the *nef* open-reading frames of SIV  $\Delta$ *nef*  
11 ( $\Delta$ Nef) and SIV  $\Delta$ *nefP* ( $\psi$ Nef) are shown in an alignment with the wild-type Nef protein  
12 of SIV<sub>mac239</sub>. Positions of amino acid identity are indicated with periods, deletions are  
13 indicated by dashes and translational stop sites are indicated by asterisks. (B)  $\psi$ Nef was  
14 tested for the ability to antagonize rhesus tetherin by transfecting 293T cells with SIV  
15  $\Delta$ *env* $\Delta$ *nef* proviral DNA, an expression construct for rhesus tetherin (rBST-2.1), and  
16 increasing amounts of an expression construct for  $\psi$ Nef (75-200 ng). Virus release was  
17 measured by SIV p27 antigen-capture ELISA and is shown as a percentage of maximal  
18 release in the absence of tetherin. Error bars indicate the standard deviation of mean  
19 percent maximal virus release. (C) These results were corroborated by comparing virion-  
20 associated p27 in the cell culture supernatant to the levels of p55 Gag in cell lysates by  
21 western blot analysis.  $\psi$ Nef expression was confirmed by probing western blots of cell  
22 lysates with an antibody to an HA tag that was introduced at the C-terminus of the  
23 protein. (D and E) Jurkat cells were electroporated with bicistronic constructs expressing

24 Nef,  $\Delta$ Nef,  $\psi$ Nef Env or EnvITM, and enhanced green fluorescent protein (eGFP), and  
25 stained the next day with a PE- and PerCP-conjugated monoclonal antibodies to MHC  
26 class I (MHC-I) and CD4. The mean fluorescence intensities for MHC-I (D) and CD4 (E)  
27 staining on the cell surface are indicated for the transfected, eGFP<sup>+</sup> cell populations.

28

29 **Figure S3. Subsets of the five amino acid changes at the C-terminus of gp41 afford**  
30 **partial resistance to rhesus tetherin**

31 (A) The indicated amino acid substitutions were introduced into the gp41 cytoplasmic  
32 domain of SIV  $\Delta$ *nef*. (B) These SIV  $\Delta$ *nef* mutants were tested for virus release at  
33 increasing expression levels rhesus tetherin (rBST-2.1). Error bars indicate the standard  
34 deviation (+/-) of mean percent maximal virus release.

35

36 **Figure S4. Phenotypic differences in the expression levels and distribution of Env**  
37 **and tetherin in infected rhesus macaque lymphocytes**

38 Activated primary rhesus macaque lymphocytes were infected with (A) wild-type SIV,  
39 (B) SIV  $\Delta$ *nef* and (C) SIV  $\Delta$ *nefP*. Twenty-four hours after the addition of IFN $\alpha$ , the cells  
40 were fixed, permeabilized and stained with monoclonal antibodies to BST-2 (green), SIV  
41 Env (red), and with a nuclear dye (blue). The overlay images show at least 15 cells  
42 infected with each virus. The scale bar corresponds to 1  $\mu$ m.

43

## 44 SUPPLEMENTARY EXPERIMENTAL PROCEDURES

### 45 Plasmid DNA constructs

46 (a) *BST 2 expression constructs.* Human *BST-2* (*hBST-2*) was obtained from the  
47 Harvard Plasmid Database, and rhesus macaque *BST-2* alleles *rBST-2.1*, *rBST-2.2* and  
48 *rBST-2.8* were amplified by RT-PCR from mRNA isolated from peripheral blood  
49 lymphocytes of separate macaques. *BST-2* cDNAs were cloned into the *Kpn* I and *Xho* I  
50 sites of pcDNA3 (Invitrogen, Carlsbad, CA). The tetherin recombinants *rN/hBST-2*,  
51 *hN/rBST-2*, *rTM/hBST-2* and *hTM/rBST-2* were generated by exchanging sequences  
52 coding for the cytoplasmic (N) and transmembrane (TM) domains of *hBST-2* and *rBST-2*  
53 by PCR overlap extension (Jia et al., 2009). Additional amino acid substitutions were  
54 introduced into *rBST-2* and *hBST-2* by site-directed mutagenesis using QuickChange  
55 reagents (Stratagene, La Jolla, CA).

56 (b) *SIV proviral clones.* Full-length proviral DNA clones for wild-type SIV, SIV  
57  $\Delta$ *nef*, SIV  $\Delta$ *nefP*, SIV ITM $\Delta$ *nef*, SIV  $\Delta$ *env* $\Delta$ *nef*, and SIV  $\Delta$ *nef* $\Delta$ U3 were constructed from  
58 the following clones based on SIV<sub>mac239</sub>; p239SpSp5', pSP72-239-3', pSP72-239-  
59 3' $\Delta$ *nef*, pSP72-239-3'ITM $\Delta$ *nef* $\Delta$ U3 (Alexander et al., 2003; Kestler et al., 1991; Regier  
60 and Desrosiers, 1990). Additional full-length clones containing subsets of the ITM  
61 changes in *env* were generated by site-directed mutagenesis of SIV  $\Delta$ *nef*.

62 (c) *Nef and Env expression constructs.* The SIV Nef expression construct pCGCG-  
63 239-Nef was provided by Dr. Jacek Skowronski (Case Western Reserve University,  
64 Cleveland, OH). To express  $\psi$ Nef, the SIV<sub>mac239</sub> *nef* sequences in pCGCG-239-Nef  
65 were replaced with the *nef* open reading frame retained by SIV  $\Delta$ *nefP* to generate  
66 pCGCG- $\psi$ Nef. To verify protein expression, sequences coding for an HA tag were also

67 introduced in frame with the 3' end of  $\psi$ *nef*. Codon optimized versions of wild-type Env  
68 and EnvITM were also cloned into pCGCG.

69 (d) *CD4-Env fusion constructs*. A cDNA clone for human CD4 was obtained through  
70 the Harvard Plasmid Database. Constructs for the expression of CD4-Env fusion proteins  
71 were generated by cloning sequences for the transmembrane and/or cytoplasmic domain  
72 of Env and EnvITM downstream of sequences coding form the transmembrane and/or  
73 extracellular domain of CD4 into the *Kpn* I and *Xho* I sites of pcDNA3.

74 (e) *GenBank accession numbers*. Nucleotide sequences for novel alleles of rhesus  
75 tetherin and for pseudo-Nef were submitted to GenBank. The accession numbers for  
76 these sequences are as follows; rBST-2.2 (HM775182), rBST-2.8 (HQ596987) and  
77 pseudo-Nef (HM775183).

78

## 79 **Virus release assays**

80 293T cells were co-transfected with an SIV proviral DNA clone (100 ng) and one of  
81 the pcDNA3-based expression constructs for tetherin (0-200 ng). Differences in the  
82 amount of plasmid DNA in each transfection were offset by the addition of empty  
83 pcDNA3 vector (0-200 ng). To assess the ability of  $\psi$ Nef, EnvITM and the CD4-Env  
84 fusion proteins to rescue virus release in *trans*, 293T cells were co-transfected with  
85 proviral DNA for SIV  $\Delta$ *nef* or SIV  $\Delta$ *env $\Delta$ *nef* (100 ng), pcDNA3 or pcDNA3-rBST-2 (50  
86 ng), and either pCGCG, pCGCG-Env, pCGCG-EnvITM, pCGCG- $\psi$ Nef, pCGCG-239-  
87 Nef, pcDNA3-CD4, pcDNA3-CD4-Env, pcDNA3-CD4-ITM, pcDNA3-CD4-TM-Env or  
88 pcDNA3-CD4-TM-ITM (100 ng). All transfections were performed in duplicate in 24-  
89 well plates seeded the day before at  $5 \times 10^4$  cells per well using GenJet Lipid Transfection*

90 Reagents (SignaGen Laboratories, Gaithersburg, MD). Forty-eight hours after  
91 transfection, the amount of virus released into the cell culture supernatant was measured  
92 by SIV p27 antigen-capture ELISA (Advanced Bioscience Laboratories, Inc.,  
93 Kensington, MD), and was expressed as the percentage of maximal particle release in the  
94 absence of tetherin for empty vector controls.

95

#### 96 **Western blots**

97 293T cells were co-transfected with proviral DNA (100 ng) and pcDNA3-based  
98 expression constructs for either human or rhesus tetherin (0-200 ng) as described above.  
99 Forty-eight hours post-transfection, cell lysates were prepared by harvesting in 2x SDS  
100 sample buffer. Virions were recovered from the cell culture supernatant by centrifugation  
101 at 13,000 rpm for 2 hours at 4°C, and resuspended in 2x SDS sample buffer. Samples  
102 were boiled for 5 minutes, and separated by electrophoresis on 10% SDS-polyacrylamide  
103 gels and transferred to polyvinylidene fluoride (PVDF) membranes using a Trans-Blot SD  
104 transfer cell (BioRad, Hercules, CA). The membranes were then blocked with 5% non-fat  
105 dry-milk in PBS containing 0.05% Tween-20 for 1 hour, and probed overnight at 4°C  
106 with one of the following primary antibodies. Tetherin/BST-2 was detected with the  
107 monoclonal antibody HM1.24, generously provided by Chugai Pharmaceutical Co.  
108 (Kanagawa, Japan) at a dilution of 1:2000. The SIV Gag proteins p27 and p55 were  
109 detected with the monoclonal antibody 183-H12-5C (AIDS Research and Reference  
110 Reagent Program, Division of AIDS, NIAID, NIH) at a dilution of 1:1000. SIV Nef was  
111 detected using the mouse monoclonal antibody 17.2 (AIDS Research and Reference  
112 Reagent Program, Division of AIDS, NIAID, NIH) at a dilution 1:1000. The SIV Env

113 protein was detected with the gp120-specific monoclonal antibody KK42 (AIDS  
114 Research and Reference Reagent Program) at a dilution of 1:1000. Endogenous  $\beta$ -actin  
115 was detected with the monoclonal antibody C4 (Chemicon, Billerica, MA) at dilution of  
116 1:1000. HA-tagged  $\psi$ Nef was detected with the HA-specific monoclonal antibody HA.11  
117 (Covance, Princeton, NJ) at a dilution of 1:1000. Human CD4 and CD4 fusion constructs  
118 were detected using a rabbit polyclonal antibody (Sigma-Aldrich, St Louis, MO) at 1:200  
119 dilution. After rinsing three times for 10 minutes in PBS 0.05% Tween-20, the blots were  
120 probed with an HRP-conjugated goat anti-mouse secondary antibody (Pierce, Rockford,  
121 IL) or a HRP-conjugated anti-rabbit secondary antibody (Sigma-Aldrich, St Louis, MO)  
122 at a 1:2000 dilution for 1 hour. The blots were then rinsed three more times in PBS  
123 0.05% Tween-20, treated with SuperSignal West Femto Maximum Sensitivity substrate  
124 (Pierce, Rockford, IL), and imaged using a Fujifilm Image Reader LAS 3000 (Fujifilm  
125 Photo Film Co., Japan).

126

### 127 **MHC class I and CD4 downregulation in transfected Jurkat cells**

128 Ten million Jurkat cells were electroporated with bicistronic pCGCG constructs (40  
129  $\mu$ g) that express wild-type Nef,  $\Delta$ Nef,  $\psi$ Nef, Env or EnvITM and enhanced green  
130 fluorescent protein (eGFP) from a downstream internal ribosomal entry site. Twenty-four  
131 hours later, cells were stained with a PerCP-conjugated monoclonal antibody to CD4 (BD  
132 Pharmagen) and a PE-conjugated monoclonal antibody to MHC-I (HLA-ABC, Dako,  
133 Carpintería, CA). After gating on the eGFP<sup>+</sup> cells, the MFI of CD4 and MHC-I  
134 expression was determined. Data was collected using a FACSCalibur flow cytometer  
135 (Becton Dickenson) and analyzed using FlowJo 8.7 software (TreesStar).

136 **Tetherin downregulation in infected CD4<sup>+</sup> lymphocytes**

137        Activated rhesus macaque PBMCs ( $2 \times 10^6$  cells) were infected with wild-type SIV,  
138 SIV  $\Delta nef$ , SIV  $\Delta nefP$  and SIV  $\Delta nefP$  Y<sub>721A</sub> (50 ng p27 eq.). Five days post-infection, the  
139 cells were treated with IFN $\alpha$  (1000 U/ml). Forty-eight hours later, the cells were stained  
140 for BST-2 using the monoclonal antibody HM1.24 (Chugai Pharmaceutical Co.),  
141 followed by an APC-conjugated, goat anti-mouse secondary antibody (BD Pharmingen,  
142 San José, CA). The cells were then washed, and stained with a PerCP-conjugated  
143 antibody to CD4 (BD Pharmingen). After surface staining for BST-2 and CD4, the cells  
144 were permeabilized using Fix and Perm<sup>®</sup> reagents (Invitrogen), and stained for SIV Gag  
145 using the FITC-conjugated monoclonal antibody 2F12 (provided by the DAIDS/NIAID  
146 Reagents Resource Support Program for AIDS Vaccine Development, under contract of  
147 Quality Biological, Inc. and BioMolecular Technology, Inc; Principal Investigator,  
148 Ronald Brown; Program Officer, Jon Warren). The samples were then washed, fixed in  
149 2% paraformaldehyde PBS, and data was collected using a FACSCalibur flow cytometer  
150 (Becton Dickenson, San José, CA). The data were analyzed using FlowJo 8.7 software  
151 (TreesStar, San Carlos, CA).

Supplemental Figure 1

```
          10      20      30      40      50      60      70      80      90     100
FBST-2.1  MAPILYDYRKMPHDDIWKEDGGDKRCKLVVGIILGLLVIVLLGVLLIPFIIKANSEACQDGLRAVMECRNVTYLLQQELAEAGRGPRDASEAQAVTCNQTVMA
FBST-2.2  .....C...G.....I.....
FBST-2.8  .....C.....P.....

          110     120     130     140     150     160     170     180
FBST-2.1  LMASLDAEKAQGRKKVVELEGEITTLNKKLQDASAEVERLRRENKVLNARIADTDSASPDSSCAAEPPLLIILLGLSALLL
FBST-2.2  .....S.....
FBST-2.8  .....H.....
```



**A**

```

      10      20      30      40      50      60      70      80      90      100
Nef  MGGAIKRRSRPSSGDLRQRLRARGETYGRLLGEVEDGYSQSPGGLDKGLSSLSCEGQKYNQGGYMMPTFMRNPAAEEREKLAYRKNMDDIDKEDDOLVGV
ΔNef  .....
ψNef  .....GLP.....C.....E.S.....P..E.....

      110     120     130     140     150     160     170     180     190     200
Nef  SVRPKVFLRTMSYKLAIDMSHFPIKEKOGLEGIIYSARRHRILDIYLEKEBGIIFDWDQDYSGGGIRIYFKTFGWLWKLVPVWVSDAQEDDEHYLMHPAQF
ΔNef  .....
ψNef  .....

      210     220     230     240     250     260
Nef  SQWDDPWGEVLANKFDPTLAYTYEAYVRYPEEFGSKGGLSEBEVRRRLTARGLLNHADKKETR*
ΔNef  .....VSFYKRXGGTGRDLLQCKKT*
ψNef  .....VSFYKRXGGTGRDLLLOTQKSLIASQACQRKLEEG*

```

**B**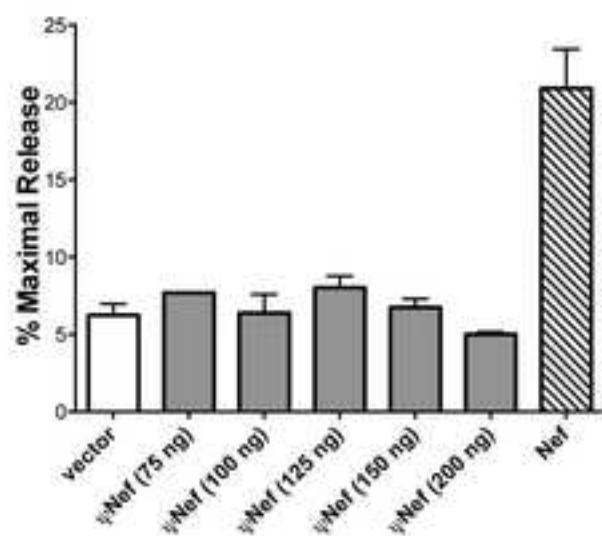**C**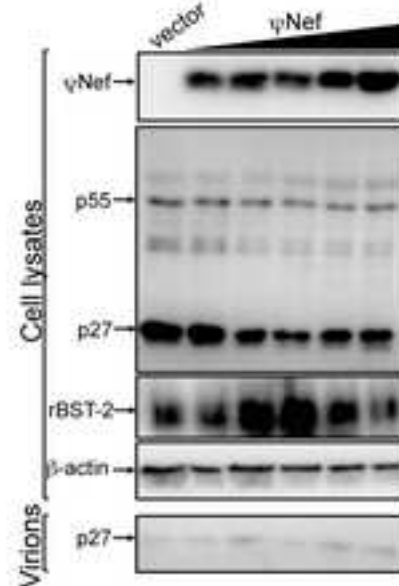**D**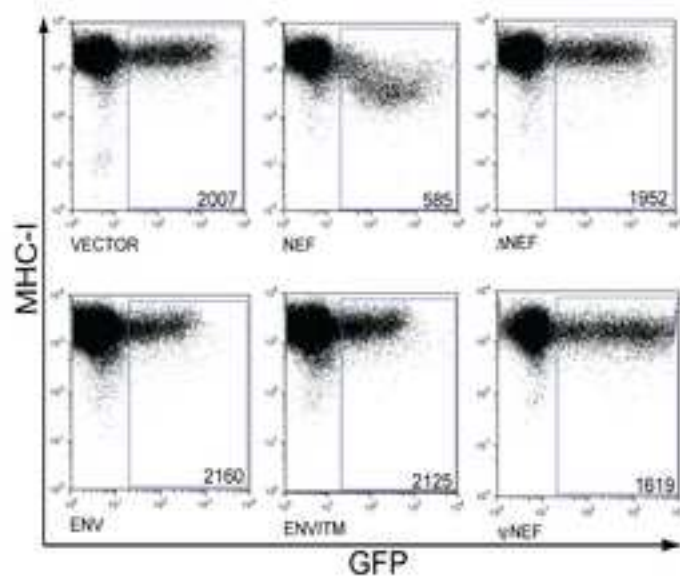**E**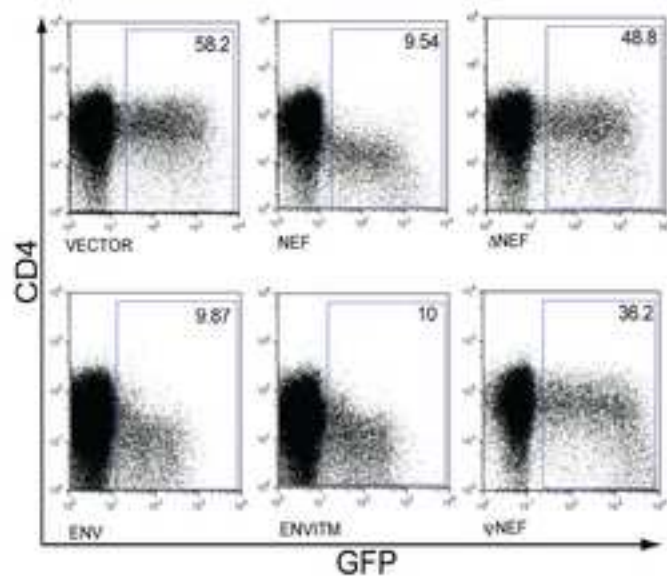

A

|       |                                                                                     |     |     |     |     |     |     |     |     |  |
|-------|-------------------------------------------------------------------------------------|-----|-----|-----|-----|-----|-----|-----|-----|--|
|       | 720                                                                                 | 730 | 740 | 750 | 760 | 770 | 780 | 790 | 800 |  |
| Env   | KLRQGYRPFVSSPPSYFQQTHIQQDPALPTRBGKERDGGEGGGNSWPWQIEYIHFLIRQLIRLLTWLFSNCRLLSRVYQILQP |     |     |     |     |     |     |     |     |  |
| IRATT | .....                                                                               |     |     |     |     |     |     |     |     |  |
| --ATT | .....                                                                               |     |     |     |     |     |     |     |     |  |
| IR-TT | .....                                                                               |     |     |     |     |     |     |     |     |  |
| IRA-T | .....                                                                               |     |     |     |     |     |     |     |     |  |
| IRAT- | .....                                                                               |     |     |     |     |     |     |     |     |  |
| IR-T- | .....                                                                               |     |     |     |     |     |     |     |     |  |
|       | 810                                                                                 | 820 | 830 | 840 | 850 | 860 | 870 | 880 |     |  |
| Env   | ILQRLSATLQRIREVLRTELTYLQYGWSYPHEAVQAVNRSATETLAGANGDLWETLRGGGRWILAIIPRRIRQGLELTL     |     |     |     |     |     |     |     |     |  |
| IRATT | .....IR.A...T.....T.....                                                            |     |     |     |     |     |     |     |     |  |
| --ATT | .....A...T.....T.....                                                               |     |     |     |     |     |     |     |     |  |
| IR-TT | .....IR...T.....T.....                                                              |     |     |     |     |     |     |     |     |  |
| IRA-T | .....IR.A.....T.....                                                                |     |     |     |     |     |     |     |     |  |
| IRAT- | .....IR.A...T.....                                                                  |     |     |     |     |     |     |     |     |  |
| IR-T- | .....IR...T.....                                                                    |     |     |     |     |     |     |     |     |  |

B

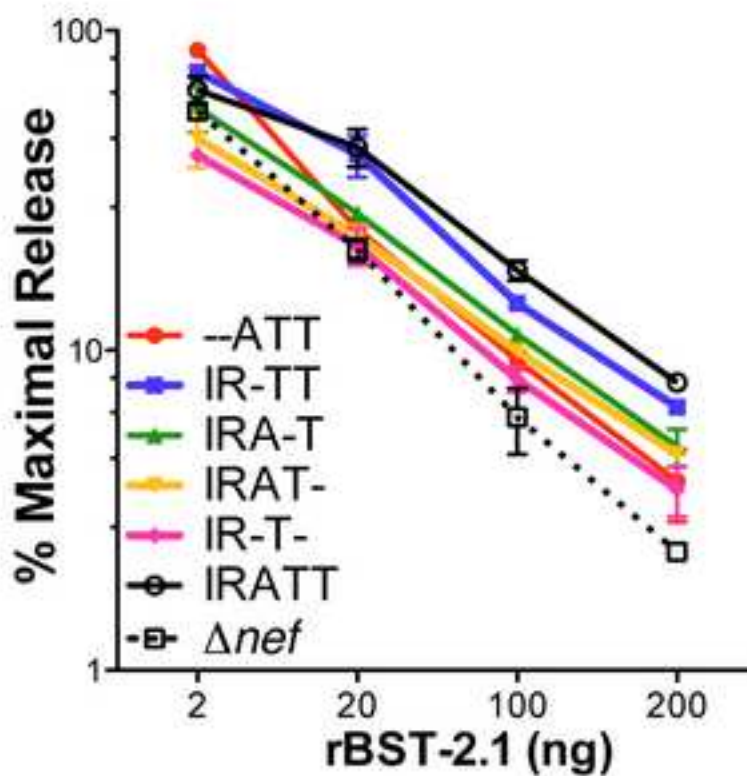

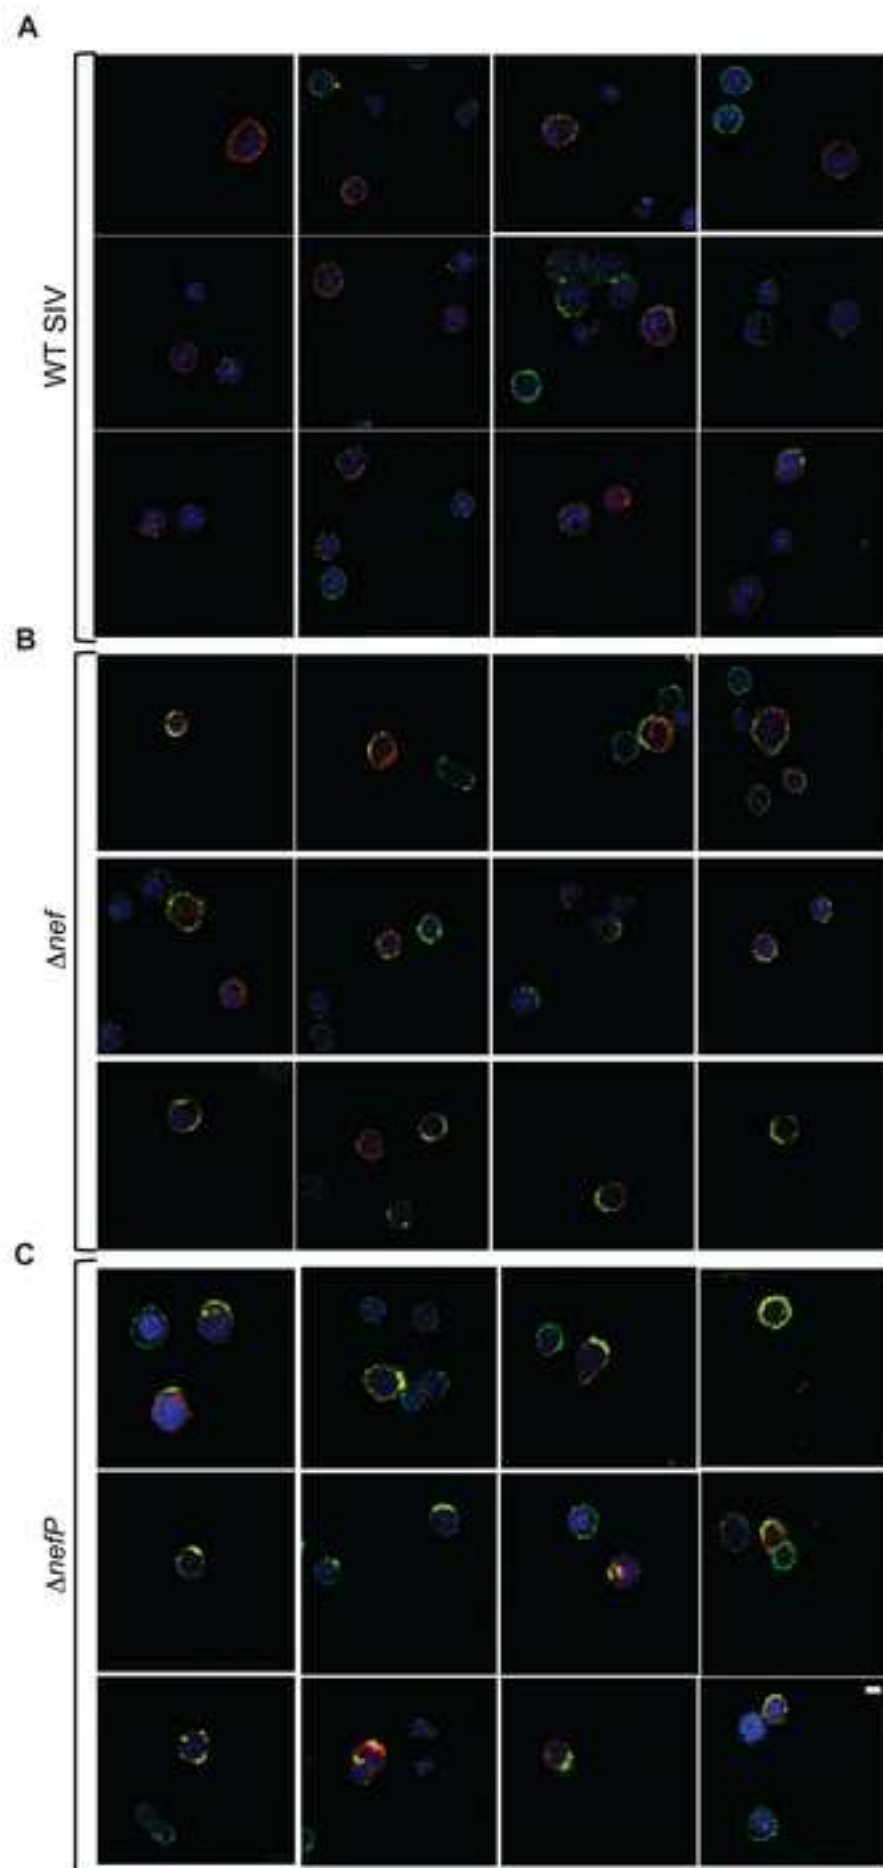

Supplement: NIHMS261810-supplement-01.pdf [file NIHMS261810-supplement-01.pdf]
